# Supplementary material
Source: Elsevier journal article supplement (https://www.sciencedirect.com/science/article/pii/S0300289617300352)
Supplement: mmc1 [file S0300289617300352:mmc1.pdf]

## Informe de 2017 de la *Global Initiative for the Diagnosis, Management and Prevention of Chronic Obstructive Lung Disease (GOLD)*

### Suplemento – Tablas y figuras

**Tabla S1.** Descripción de los grados de evidencia científica

| Categoría | Fuentes de datos                                                                                                          | Definición                                                                                                                                                                                                                                                                                                                                                                                                             |
|-----------|---------------------------------------------------------------------------------------------------------------------------|------------------------------------------------------------------------------------------------------------------------------------------------------------------------------------------------------------------------------------------------------------------------------------------------------------------------------------------------------------------------------------------------------------------------|
| A         | Ensayos aleatorizados y controlados (EAC)<br><br>Conjunto de datos de gran calidad sin limitaciones ni sesgos importantes | Los datos proceden de criterios de valoración de EAC bien diseñados con resultados relevantes en la población objeto de la recomendación sin limitaciones importantes.<br><br>Se precisan datos de gran calidad de $\geq 2$ ensayos clínicos con un número importante de pacientes o un solo EAC de gran calidad con un número importante de pacientes sin sesgos.                                                     |
| B         | Ensayos aleatorizados y controlados (EAC) con limitaciones importantes<br><br>Conjunto limitado de datos científicos      | Los datos proceden de EAC que incluyen solo una cifra limitada de pacientes, análisis <i>post-hoc</i> o de subgrupos de EAC o meta-análisis de EAC.<br><br>También se refiere a cuando hay pocos EAC o hay limitaciones importantes evidentes (defectos metodológicos, cifras limitadas, corta duración, población que difiere de la población a la que va destinada la recomendación o resultados algo heterogéneos). |
| C         | Ensayos no aleatorizados<br><br>Estudios observacionales                                                                  | Los datos proceden de resultados de ensayos no controlados o no aleatorizados o de estudios observacionales.                                                                                                                                                                                                                                                                                                           |
| D         | Criterio de consenso de un grupo                                                                                          | Las recomendaciones se consideran útiles, pero la literatura clínica que aborda el tema es insuficiente.<br><br>El consenso de un grupo está basado en experiencia o conocimiento clínico que incumplen los criterios señalados anteriormente.                                                                                                                                                                         |

**Tabla S2.** Vacunación en la EPOC estable

- La vacunación antigripal disminuye la enfermedad grave y la mortalidad en los pacientes con EPOC (**evidencia B**).
- La vacuna antineumocócica de polisacáridos 23-valente (PPSV23) reduce la incidencia de neumonía extrahospitalaria en los pacientes con EPOC < 65 años con un FEV<sub>1</sub> < 40 % del valor teórico y los pacientes con enfermedades concomitantes (**evidencia B**).
- En la población general de adultos ≥ 65 años, la vacuna antineumocócica conjugada 13-valente (PCV13) disminuye la bacteriemia y la enfermedad neumocócica invasora grave (**evidencia B**).

**Tabla S3.** Medicamentos de mantenimiento de uso habitual en la EPOC

| Fármaco                                                                                                       | Inhalador (µg)                                         | Solución para nebulizador (mg/ml) | Oral                                                                                              | Viales para inyección (mg) | Duración de la acción (horas)   |
|---------------------------------------------------------------------------------------------------------------|--------------------------------------------------------|-----------------------------------|---------------------------------------------------------------------------------------------------|----------------------------|---------------------------------|
| <b>Agonistas <math>\beta_2</math></b>                                                                         |                                                        |                                   |                                                                                                   |                            |                                 |
| <i>Acción corta</i>                                                                                           |                                                        |                                   |                                                                                                   |                            |                                 |
| Fenoterol                                                                                                     | 100-200 (ID)                                           | 1                                 | 2,5 mg (comprimido),<br>0,05 % (jarabe)                                                           |                            | 4-6                             |
| Levalbuterol                                                                                                  | 45-90 (ID)                                             | 0,1 , 0,21 , 0,25 , 0,42          |                                                                                                   |                            | 6-8                             |
| Salbutamol                                                                                                    | 90, 100, 200 (ID e IPS) <sup>†</sup>                   | 1, 2, 2,5, 5 mg/ml                | 2, 4, 5 mg (comprimido),<br>8 mg (comprimido de liberación prolongada)<br>0,024 %/0,4 mg (jarabe) | 0,1, 0,5 mg                | 4-6, 12 (liberación prolongada) |
| Terbutalina                                                                                                   | 500 (IPS)                                              |                                   | 2,5, 5 mg (comprimido)                                                                            | 0,2 , 0,25 , 1 mg          | 4-6                             |
| <i>Acción prolongada</i>                                                                                      |                                                        |                                   |                                                                                                   |                            |                                 |
| Arformoterol                                                                                                  |                                                        | 0,0075 <sup>†</sup>               |                                                                                                   |                            | 12                              |
| Formoterol                                                                                                    | 4,5-9 (IPS)                                            | 0,01 <sup>^</sup>                 |                                                                                                   |                            | 12                              |
| Indacaterol                                                                                                   | 75-300 (IPS)                                           |                                   |                                                                                                   |                            | 24                              |
| Olodaterol                                                                                                    | 2,5 , 5 (INF)                                          |                                   |                                                                                                   |                            | 24                              |
| Salmeterol                                                                                                    | 25-50 (ID e IPS)                                       |                                   |                                                                                                   |                            | 12                              |
| <b>Anticolinérgicos</b>                                                                                       |                                                        |                                   |                                                                                                   |                            |                                 |
| <i>Acción corta</i>                                                                                           |                                                        |                                   |                                                                                                   |                            |                                 |
| Bromuro de ipratropio                                                                                         | 20, 40 (ID)                                            | 0,2                               |                                                                                                   |                            | 6-8                             |
| Bromuro de oxitropio                                                                                          | 100 (ID)                                               |                                   |                                                                                                   |                            | 7-9                             |
| <i>Acción prolongada</i>                                                                                      |                                                        |                                   |                                                                                                   |                            |                                 |
| Bromuro de aclidinio                                                                                          | 400 (IPS), 400 (ID)                                    |                                   |                                                                                                   |                            | 12                              |
| Bromuro de glucopirronio                                                                                      | 15,6 y 50 (IPS) <sup>†</sup>                           |                                   | 1 mg (solución)                                                                                   | 0,2 mg                     | 12-24                           |
| Tiotropio                                                                                                     | 18 (ID), 2,5 y 5 (INF)                                 |                                   |                                                                                                   |                            | 24                              |
| Umeclidinio                                                                                                   | 62,5 (IPS)                                             |                                   |                                                                                                   |                            | 24                              |
| <b>Combinación de agonista <math>\beta_2</math> de acción corta y anticolinérgico en un dispositivo</b>       |                                                        |                                   |                                                                                                   |                            |                                 |
| Fenoterol/ipratropio                                                                                          | 50/20 (INF)                                            | 1,25 , 0,5 mg en 4 ml             |                                                                                                   |                            | 6-8                             |
| Salbutamol/ipratropio                                                                                         | 100/20 (INF), 75/15 (ID)                               | 0,5 , 2,5 mg en 3 ml              |                                                                                                   |                            | 6-8                             |
| <b>Combinación de agonista <math>\beta_2</math> de acción prolongada y anticolinérgico en un dispositivo</b>  |                                                        |                                   |                                                                                                   |                            |                                 |
| Formoterol/aelidinio                                                                                          | 12/400 (IPS)                                           |                                   |                                                                                                   |                            | 12                              |
| Formoterol/glucopirronio                                                                                      | 9,6/14,4 (ID)                                          |                                   |                                                                                                   |                            | 12                              |
| Indacaterol/glucopirronio                                                                                     | 27,5/15,6 y 110/50 (IPS) <sup>†</sup>                  |                                   |                                                                                                   |                            | 12-24                           |
| Vilanterol/umeclidinio                                                                                        | 25/62,5 (IPS)                                          |                                   |                                                                                                   |                            | 24                              |
| Olodaterol/tiotropio                                                                                          | 5/5 (INF)                                              |                                   |                                                                                                   |                            | 24                              |
| <b>Metilxantinas</b>                                                                                          |                                                        |                                   |                                                                                                   |                            |                                 |
| Aminofilina                                                                                                   |                                                        |                                   | 105 mg/ml (solución)                                                                              | 250, 500 mg                | Variable, hasta 24              |
| Teofilina (SR)                                                                                                |                                                        |                                   | 100-600 mg (comprimido)                                                                           | 250, 400, 500 mg           | Variable, hasta 24              |
| <b>Combinación de agonista <math>\beta_2</math> de acción prolongada y corticosteroides en un dispositivo</b> |                                                        |                                   |                                                                                                   |                            |                                 |
| Formoterol/beclometasona                                                                                      | 6/100 (ID e IPS)                                       |                                   |                                                                                                   |                            |                                 |
| Formoterol/budesónida                                                                                         | 4,5/160 (ID), 4,5/80 (ID),<br>9/320 (IPS), 9/160 (IPS) |                                   |                                                                                                   |                            |                                 |
| Formoterol/mometasona                                                                                         | 10/200, 10/400 (ID)                                    |                                   |                                                                                                   |                            |                                 |
| Salmeterol/fluticasona                                                                                        | 5/100, 50/250, 5/500 (IPS), 21/45, 21/115, 21/230 (ID) |                                   |                                                                                                   |                            |                                 |
| Vilanterol/furoato de fluticasona                                                                             | 25/100 (IPS)                                           |                                   |                                                                                                   |                            |                                 |
| <b>Inhibidores de la fosfodiesterasa 4</b>                                                                    |                                                        |                                   |                                                                                                   |                            |                                 |
| Roflumilast                                                                                                   |                                                        |                                   | 500 µg (comprimido)                                                                               |                            |                                 |

ID = inhalador dosificador; IPS = inhalador de polvo seco; INF = inhalador de niebla fina

\* No todas las formulaciones están disponibles en todos los países; en algunos puede haber otras formulaciones y dosis

<sup>†</sup> La disponibilidad de dosis varía según el país<sup>^</sup> La solución nebulizada de formoterol está basada en el vial de dosis unitario que contiene 20 µg en un volumen de 2,0 ml<sup>†</sup> La dosis varía según el país

**Tabla S4.** Otros tratamientos farmacológicos

|                                                                                                                                                                    |
|--------------------------------------------------------------------------------------------------------------------------------------------------------------------|
| <b>Tratamiento de aumento de la alfa-1 antitripsina</b>                                                                                                            |
| <ul style="list-style-type: none"><li>• El tratamiento de aumento por vía intravenosa retrasa la progresión del enfisema (<b>evidencia B</b>).</li></ul>           |
| <b>Antitusivos</b>                                                                                                                                                 |
| <ul style="list-style-type: none"><li>• No se ha demostrado ningún efecto beneficioso de los antitusivos en los pacientes con EPOC (<b>evidencia C</b>).</li></ul> |
| <b>Vasodilatadores</b>                                                                                                                                             |
| <ul style="list-style-type: none"><li>• Los vasodilatadores no mejoran los resultados y pueden empeorar la oxigenación (<b>evidencia B</b>).</li></ul>             |

**Tabla S5.** Rehabilitación respiratoria, autocontrol y asistencia integrada en la EPOC

|                                                                                                                                                                                                                                                                                                                                                                                                                         |
|-------------------------------------------------------------------------------------------------------------------------------------------------------------------------------------------------------------------------------------------------------------------------------------------------------------------------------------------------------------------------------------------------------------------------|
| <b>Rehabilitación respiratoria</b>                                                                                                                                                                                                                                                                                                                                                                                      |
| <ul style="list-style-type: none"><li>• La rehabilitación respiratoria mejora la disnea, el estado de salud y la tolerancia al esfuerzo en los pacientes estables (<b>evidencia A</b>).</li><li>• La rehabilitación respiratoria disminuye las hospitalizaciones en los pacientes con una exacerbación reciente (<math>\leq 4</math> semanas con respecto a una hospitalización previa) (<b>evidencia B</b>).</li></ul> |
| <b>Educación y autocontrol</b>                                                                                                                                                                                                                                                                                                                                                                                          |
| <ul style="list-style-type: none"><li>• La educación por sí sola no es eficaz (<b>evidencia C</b>).</li><li>• La intervención de autocontrol bajo el control de un profesional sanitario mejora el estado de salud y disminuye las hospitalizaciones y las visitas de urgencias (<b>evidencia B</b>).</li></ul>                                                                                                         |
| <b>Programas de asistencia integrada</b>                                                                                                                                                                                                                                                                                                                                                                                |
| <ul style="list-style-type: none"><li>• La asistencia integrada y la tele-monitorización no tienen ningún beneficio actualmente (<b>evidencia B</b>).</li></ul>                                                                                                                                                                                                                                                         |

**Tabla S6.** Cuidados paliativos y terminales en la EPOC

- Los opioides, la estimulación eléctrica neuromuscular (EENM), el oxígeno y los abanicos pueden aliviar la disnea (**evidencia C**).
- En los pacientes desnutridos, los suplementos nutritivos mejoran la fuerza de los músculos respiratorios y el estado de salud general (**evidencia B**).
- La fatiga se puede mejorar con autocontrol, rehabilitación respiratoria, soporte nutricional e intervenciones para la salud mental y el organismo (**evidencia B**).

**Tabla S7.** Oxigenoterapia y respiración asistida en la EPOC estable

| <b>Oxigenoterapia</b>                                                                                                                                                                                                                                                                                                                                                                                                                                                                                                                                                                                                                                                                                                                            |
|--------------------------------------------------------------------------------------------------------------------------------------------------------------------------------------------------------------------------------------------------------------------------------------------------------------------------------------------------------------------------------------------------------------------------------------------------------------------------------------------------------------------------------------------------------------------------------------------------------------------------------------------------------------------------------------------------------------------------------------------------|
| <ul style="list-style-type: none"><li>• La administración a largo plazo de oxígeno aumenta la supervivencia de los pacientes con hipoxemia arterial crónica grave en reposo (<b>evidencia A</b>).</li><li>• En los pacientes con EPOC estable y desaturación arterial moderada inducida por el esfuerzo o en reposo, la prescripción de oxígeno a largo plazo no prolonga el tiempo hasta el fallecimiento o la primera hospitalización ni tiene un efecto beneficioso sostenido sobre el estado de salud, la función pulmonar y la prueba de marcha de 6 minutos (<b>evidencia A</b>).</li><li>• La oxigenación en reposo a nivel del mar no excluye el desarrollo de hipoxemia severa cuando se viaja en avión (<b>evidencia C</b>).</li></ul> |
| <b>Respiración asistida</b>                                                                                                                                                                                                                                                                                                                                                                                                                                                                                                                                                                                                                                                                                                                      |
| <ul style="list-style-type: none"><li>• La ventilación no invasiva (VNI) aumenta la supervivencia sin hospitalización en determinados pacientes después de una hospitalización reciente, sobre todo en los que presentan hipercapnia persistente diurna</li></ul>                                                                                                                                                                                                                                                                                                                                                                                                                                                                                |

**Tabla S8.** Tratamiento intervencionista en la EPOC estable

|                                                                                                                                                                                                                                                                                                                                                                                                 |
|-------------------------------------------------------------------------------------------------------------------------------------------------------------------------------------------------------------------------------------------------------------------------------------------------------------------------------------------------------------------------------------------------|
| <b>Cirugía de reducción del volumen pulmonar</b>                                                                                                                                                                                                                                                                                                                                                |
| <ul style="list-style-type: none"> <li>La cirugía de reducción del volumen pulmonar aumenta la supervivencia de los pacientes con enfisema severo en lóbulos superiores y poca capacidad de esfuerzo después de la rehabilitación (<b>evidencia A</b>).</li> </ul>                                                                                                                              |
| <b>Bullectomía</b>                                                                                                                                                                                                                                                                                                                                                                              |
| <ul style="list-style-type: none"> <li>En determinados pacientes, la bullectomía disminuye la disnea y mejora la función pulmonar y la tolerancia al esfuerzo (<b>evidencia C</b>).</li> </ul>                                                                                                                                                                                                  |
| <b>Trasplante</b>                                                                                                                                                                                                                                                                                                                                                                               |
| <ul style="list-style-type: none"> <li>En pacientes seleccionados adecuadamente con EPOC muy severa, el trasplante de pulmón mejora la calidad de vida y la capacidad funcional (<b>evidencia C</b>).</li> </ul>                                                                                                                                                                                |
| <b>Intervenciones broncoscópicas</b>                                                                                                                                                                                                                                                                                                                                                            |
| <ul style="list-style-type: none"> <li>En determinados pacientes con enfisema avanzado, las intervenciones broncoscópicas disminuyen el volumen pulmonar espiratorio final y mejoran la tolerancia al esfuerzo, el estado de salud y la función pulmonar a los 6-12 meses del tratamiento. Válvulas endobronquiales (<b>evidencia B</b>); espirales pulmonares (<b>evidencia B</b>).</li> </ul> |



**Figura S1.** Objetivos del tratamiento de la EPOC estable

- Aliviar los síntomas
  - Mejorar la tolerancia al esfuerzo
  - Mejorar el estado de salud

REDUCIR SÍNTOMAS
- y
- Prevenir la progresión de la enfermedad
  - Prevenir y tratar las exacerbaciones
  - Reducir la mortalidad

REDUCIR RIESGO

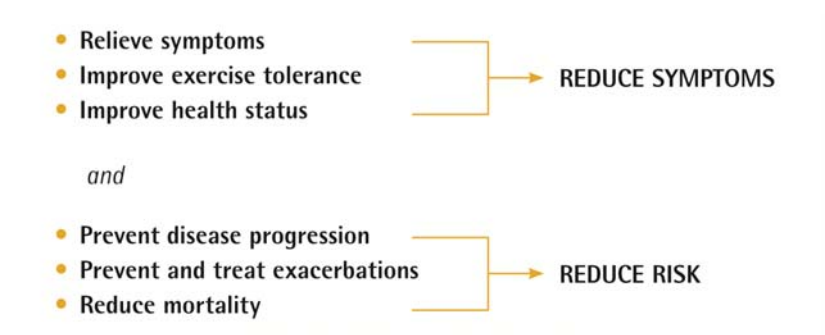

**Tabla S9.** Puntos clave para el uso de tratamientos no farmacológicos

**Educación, autocontrol y rehabilitación respiratoria**

- La educación aumenta los conocimientos del paciente, pero no se ha demostrado que por sí sola modifique su comportamiento diario.
- Está recomendada la educación mediante autocontrol con la ayuda de un profesional, con o sin un plan escrito, para prevenir complicaciones de las exacerbaciones, como puede ser la hospitalización (**evidencia B**).
- La rehabilitación está indicada para todos los pacientes con síntomas importantes o alto riesgo de exacerbación y es la intervención más eficaz para mejorar la capacidad de esfuerzo y el estado de salud (**evidencia A**).
- La actividad física es un potente factor de predicción de la mortalidad (**evidencia A**). Hay que recomendar a los pacientes que aumenten el nivel de actividad física.

**Vacunación**

- Se recomienda la vacunación antigripal para todos los pacientes con EPOC (**evidencia A**).
- Vacunación antineumocócica: la PCV13 y la PPSV23 están recomendadas para todos los pacientes >65 años y los pacientes más jóvenes con comorbilidades importantes, como las cardiopatías o enfermedades pulmonares crónicas (**evidencia B**).

**Nutrición**

- Hay que considerar la administración de suplementos nutritivos a los pacientes desnutridos con EPOC (**evidencia B**).

**Cuidados paliativos y terminales**

- Todos los médicos que tratan a pacientes con EPOC deben ser conscientes de la eficacia de los métodos paliativos para controlar los síntomas (**evidencia D**).
- Los cuidados terminales deben incluir conversaciones con los pacientes y sus familiares sobre sus opiniones con respecto a la reanimación y las preferencias de las voluntades anticipadas (**evidencia D**).

**Tratamiento de la hipoxemia**

- En los pacientes con hipoxemia grave en reposo está indicada la oxigenoterapia a largo plazo porque se ha demostrado que disminuye la mortalidad (**evidencia A**).
- En los pacientes con EPOC estable y desaturación arterial moderada inducida por el esfuerzo o en reposo, la prescripción de oxígeno a largo plazo no prolonga el tiempo hasta la muerte o la primera hospitalización ni tiene un efecto beneficioso sostenido sobre la calidad de vida, la función pulmonar y la prueba de marcha de 6 minutos (**evidencia A**).
- La oxigenación en reposo a nivel del mar no excluye el desarrollo de una hipoxemia grave cuando se viaja en avión (**evidencia C**).

**Tratamiento de la hipercapnia**

- La ventilación no invasiva (VNI) debe ser el primer método de ventilación utilizado en los pacientes con EPOC e insuficiencia respiratoria aguda porque mejora el intercambio gaseoso, reduce la necesidad de intubación, disminuye la duración de la hospitalización y aumenta la supervivencia (**evidencia A**).
- En los pacientes con hipercapnia crónica grave y con antecedentes de hospitalización por insuficiencia respiratoria aguda cabe considerar la VNI a largo plazo (**evidencia B**).

### Broncoscopia y cirugía intervencionistas

- La cirugía de reducción del volumen pulmonar mejora la función pulmonar, la capacidad de esfuerzo y la calidad de vida en determinados pacientes con enfisema de los lóbulos superiores y aumenta la supervivencia en un subgrupo con enfisema de los lóbulos superiores y poca capacidad de esfuerzo después de la rehabilitación (**evidencia A**).
- En determinados pacientes con enfisema avanzado, las intervenciones broncoscópicas disminuyen el volumen pulmonar espiratorio final y mejoran la tolerancia al esfuerzo, la calidad de vida y la función pulmonar a los 6-12 meses del tratamiento con válvulas endobronquiales (**evidencia B**) o espirales pulmonares (**evidencia B**).
- En determinados pacientes con bullas grandes se puede considerar la bullectomía quirúrgica (**evidencia C**).
- En los pacientes con EPOC muy grave (progresión de la enfermedad, puntuación de BODE de 7 a 10 y falta de idoneidad para reducción del volumen pulmonar) se puede considerar el trasplante de pulmón, atendiendo al menos una de las circunstancias siguientes: (1) antecedentes de hospitalización por exacerbación asociada a hipercapnia aguda ( $\text{PaCO}_2 > 50 \text{ mm Hg}$ ); (2) hipertensión pulmonar o corazón pulmonar, a pesar de la oxigenoterapia; o (3)  $\text{FEV}_1 < 20 \%$  y  $\text{DL}_{\text{CO}} < 20 \%$  o distribución homogénea del enfisema (**evidencia C**).

**Tabla S10.** Posibles indicaciones para valorar la hospitalización\*

- Síntomas graves, como empeoramiento súbito de la disnea en reposo, frecuencia respiratoria elevada, disminución de la saturación arterial de oxígeno, confusión y somnolencia.
- Insuficiencia respiratoria aguda.
- Aparición de nuevos signos físicos (p. ej., cianosis, edema periférico).
- Falta de respuesta de una exacerbación al tratamiento médico inicial.
- Presencia de enfermedades concomitantes graves (p. ej., insuficiencia cardíaca, arritmias nuevas, etc.).
- Apoyo insuficiente en casa.

\*Es necesario considerar los recursos locales.

**Tabla S11.** Criterios para el alta y recomendaciones para el seguimiento

|                                                                                                                                                                                                                                                                                                                                                                                                                                                                                                                                                                                                                                                                                                                                                  |
|--------------------------------------------------------------------------------------------------------------------------------------------------------------------------------------------------------------------------------------------------------------------------------------------------------------------------------------------------------------------------------------------------------------------------------------------------------------------------------------------------------------------------------------------------------------------------------------------------------------------------------------------------------------------------------------------------------------------------------------------------|
| <ul style="list-style-type: none"> <li>• Revisar de manera exhaustiva todos los datos clínicos y analíticos.</li> <li>• Comprobar el tratamiento de mantenimiento y su conocimiento.</li> <li>• Reevaluar la técnica de inhalación.</li> <li>• Comprobar el conocimiento de la retirada de los fármacos a corto plazo (glucocorticoides y antibióticos).</li> <li>• Evaluar la necesidad de mantener la oxigenoterapia.</li> <li>• Establecer un plan de tratamiento para las enfermedades concomitantes y el seguimiento.</li> <li>• Organizar el seguimiento: seguimiento inicial &lt;4 semanas y seguimiento tardío &lt;12 semanas, según esté indicado.</li> <li>• Se han identificado todas las anomalías clínicas o analíticas.</li> </ul> |
| <p style="text-align: center;"><b>1–4 semanas de seguimiento</b></p> <p style="text-align: center;">↓</p>                                                                                                                                                                                                                                                                                                                                                                                                                                                                                                                                                                                                                                        |
| <ul style="list-style-type: none"> <li>• Evaluar la capacidad de afrontamiento en el ambiente habitual.</li> <li>• Revisar y entender la pauta de tratamiento.</li> <li>• Reevaluar las técnicas de inhalación.</li> <li>• Reevaluar la necesidad de oxígeno a largo plazo.</li> <li>• Documentar la capacidad para realizar actividad física y las actividades cotidianas.</li> <li>• Documentar los síntomas: CAT o mMRC.</li> <li>• Determinar la situación de las enfermedades concomitantes.</li> </ul>                                                                                                                                                                                                                                     |
| <p style="text-align: center;"><b>12–16 semanas de seguimiento</b></p> <p style="text-align: center;">↓</p>                                                                                                                                                                                                                                                                                                                                                                                                                                                                                                                                                                                                                                      |
| <ul style="list-style-type: none"> <li>• Evaluar la capacidad de afrontamiento en su ambiente habitual.</li> <li>• Revisar el conocimiento de la pauta terapéutica.</li> <li>• Reevaluar las técnicas de inhalación.</li> <li>• Reevaluar la necesidad de oxígeno a largo plazo.</li> <li>• Documentar la capacidad para realizar actividad física y las actividades cotidianas.</li> <li>• Hacer una espirometría: FEV<sub>1</sub>.</li> <li>• Documentar los síntomas: CAT o mMRC.</li> <li>• Determinar la situación de las enfermedades concomitantes.</li> </ul>                                                                                                                                                                            |
| <p>CAT, cuestionario de calidad de vida “<i>COPD Assessment test</i>”; FEV<sub>1</sub>, volumen máximo de aire espirado en el primer segundo; mMRC, escala modificada de disnea del <i>Medical Research Council</i></p>                                                                                                                                                                                                                                                                                                                                                                                                                                                                                                                          |

**Tabla S12.** Intervenciones que disminuyen la frecuencia de exacerbaciones de la EPOC

| Clase de intervención                                                                                                                            | Intervención                                                                |
|--------------------------------------------------------------------------------------------------------------------------------------------------|-----------------------------------------------------------------------------|
| <b>Broncodilatadores</b>                                                                                                                         | LABA<br>LAMA<br>LABA + LAMA                                                 |
| <b>Pautas con corticosteroides</b>                                                                                                               | LABA + IC<br>LABA + LAMA + IC                                               |
| <b>Antiinflamatorios (no esteroideos)</b>                                                                                                        | Roflumilast                                                                 |
| <b>Antibióticos</b>                                                                                                                              | Vacunas<br>Macrólidos a largo plazo                                         |
| <b>Mucorreguladores</b>                                                                                                                          | N-acetilcisteína<br>Carbocisteína                                           |
| <b>Otros</b>                                                                                                                                     | Abandono del tabaquismo<br>Rehabilitación<br>Reducción del volumen pulmonar |
| Por sus siglas en inglés: IC, corticoides inhalados; LABA, agonistas $\beta_2$ de acción prolongada; LAMA, antimuscarínicos de acción prolongada |                                                                             |
